# Supplementary material for: Oligopeptide-modified poly(beta-amino ester)s-coated AdNuPARmE1A: Boosting the efficacy of intravenously administered therapeutic adenoviruses
Source: PubMed Central journal article supplement (PMC7052890; doi:10.7150/thno.40902), 2020-02-03
Supplement: thnov10p2744s1.pdf [file thnov10p2744s1.pdf]

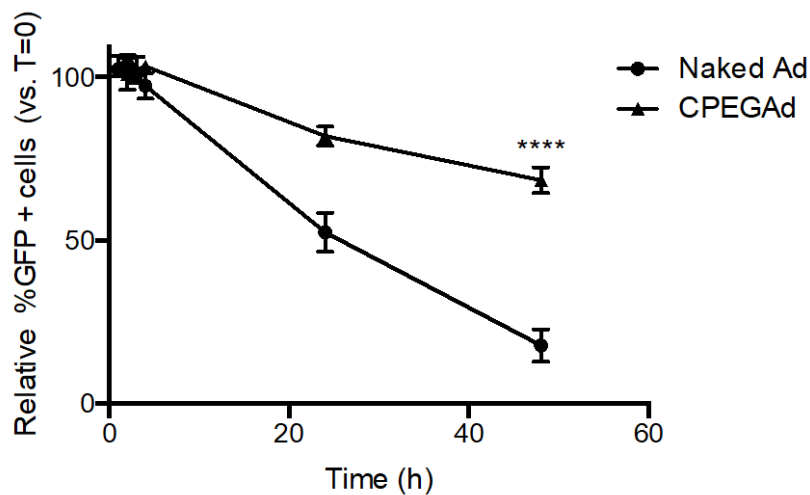

**Figure S1. Stability of CPEGAd under physiological conditions.** AdGFPLuc and CPEGAd were incubated at 37°C in PBS for the indicated periods, after which they were tested in transduction assays in PANC-1 cells. Quantification of GFP-positive cells was performed at 48 hr post-transduction. Data show mean values  $\pm$  SEM. \* $P < 0.05$ , \*\* $P < 0.01$ , \*\*\* $P < 0.001$ , \*\*\*\* $P < 0.0001$ .

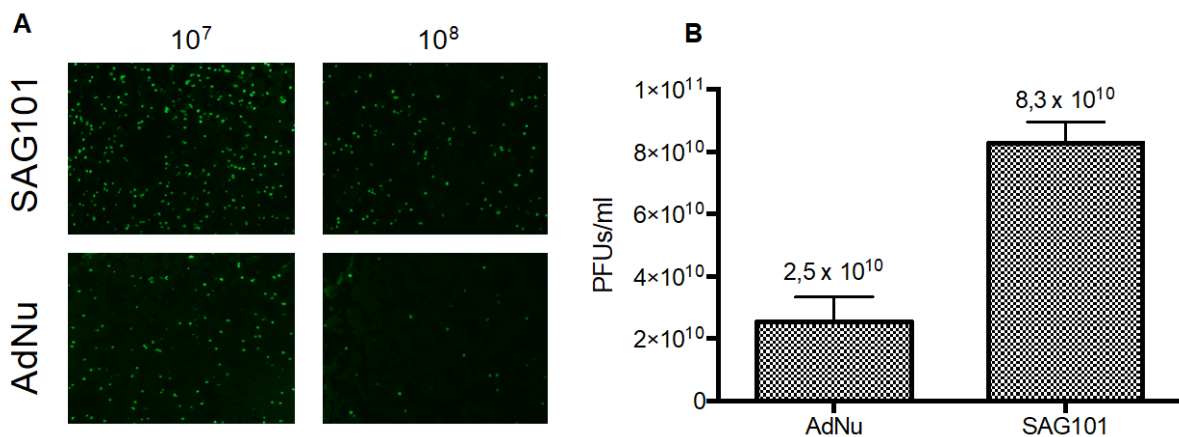

**Figure S2. *In vitro* viral infectivity of SAG101.** **A** Fluorescence microscopy images of HEXON immunostained PANC-1 cells infected at different SAG101 and AdNu virus sample dilutions. **B** Resulting virus titer obtained in PFUs/ml for each formulation.

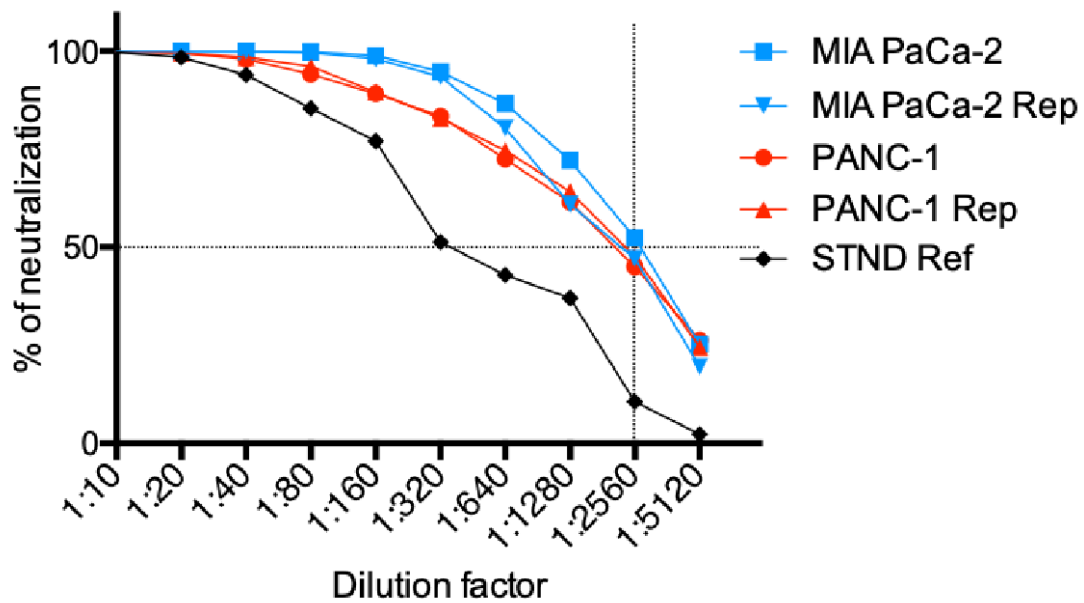

**Figure S3. *In vitro* neutralization assay of Ad5 antisera used for passive immunization *in vivo*.** The neutralizing capacity of sera collected from naïve C57BL/6J mice after intravenous administration of two doses of naked Ad ( $1 \times 10^{10}$  vp/animal) were administered at day 1 and day 14, and serum was collected at day 21 post-injection. The hatched lines indicate the ND50 of each sample. Each sample was analyzed twice (indicated by Rep) in triplicate.
